# Supplementary material
Source: publisher site journal article supplement (http://www.kjim.org/upload/media/kjim-2021-026-suppl5.pdf)
Supplement: Supplementary file 1 [file kjim-2021-026-suppl5.pdf]

**Supplementary Table 5. Pearson's correlation coefficients for personal hygiene after the COVID-19 outbreak, South Korea**

| Variable                                                    | (1)                | (2)                | (3)                | (4)                | (5)                | (6) |
|-------------------------------------------------------------|--------------------|--------------------|--------------------|--------------------|--------------------|-----|
| (1) Wearing a mask during regular outings or at work        | 1                  |                    |                    |                    |                    |     |
| (2) Wearing a mask in public transportation                 | 0.554 <sup>a</sup> | 1                  |                    |                    |                    |     |
| (3) Wearing a mask in public indoor space with other people | 0.624 <sup>a</sup> | 0.771 <sup>a</sup> | 1                  |                    |                    |     |
| (4) Adhering to correct cough etiquette                     | 0.363 <sup>a</sup> | 0.365 <sup>a</sup> | 0.365 <sup>a</sup> | 1                  |                    |     |
| (5) Adhering to correct hand-washing                        | 0.379 <sup>a</sup> | 0.347 <sup>a</sup> | 0.355 <sup>a</sup> | 0.533 <sup>a</sup> | 1                  |     |
| (6) Hand-washing number                                     | 0.251 <sup>a</sup> | 0.207 <sup>a</sup> | 0.256 <sup>a</sup> | 0.349 <sup>a</sup> | 0.498 <sup>a</sup> | 1   |

COVID-19, coronavirus disease 2019.

<sup>a</sup> $p < 0.001$ .

<sup>b</sup> $p = 0.001$
